# Supplementary material
Source: Springer Nature journal article supplement (https://www.springermedizin.de/resource/supplementary/12889_2013_5585_MOESM2_ESM.pdf/9495758)
Supplement: MOESM2 [file 9495758]

16 weeks

31% participation

56% participation

81% participation

Proportion of the Population Requiring TX (%)

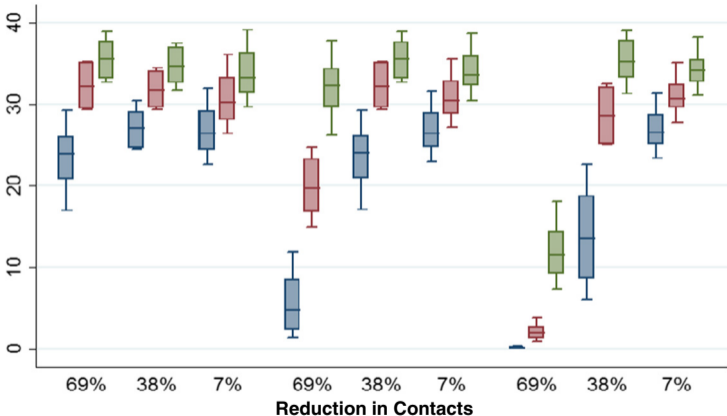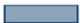

R0 = 1.6

R0 = 1.8

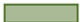

R0 = 2.0
